# Supplementary material for: Maintaining musculoskeletal health using a behavioural therapy approach: a population-based randomised controlled trial (the MAmMOTH Study)
Source: PubMed Central journal article supplement — Ann Rheum Dis. 2021 Feb 1;80(7):903–11. doi: 10.1136/annrheumdis-2020-219091 (PMC8237175; doi:10.1136/annrheumdis-2020-219091), 2021-02-01
Supplement: annrheumdis-2020-219091supp002.pdf [file annrheumdis-2020-219091supp002.pdf]

## SUPPLEMENTARY MATERIAL

**Table S1: Outcomes by treatment arm at 3 months (Intention to treat analysis)**

| Characteristic                        | Randomised groups        |                          |
|---------------------------------------|--------------------------|--------------------------|
|                                       | tCBT (n=500)             | Usual care (n=496)       |
| Primary Outcome                       | N (%)                    |                          |
| Chronic widespread pain               |                          |                          |
| No                                    | 312 (82.1)               | 368 (83.1)               |
| Yes                                   | 68 (17.9)                | 75 (16.9)                |
| Secondary Outcome                     |                          |                          |
| Global impression of change           |                          |                          |
| Very much better                      | 14 (3.7)                 | 15 (3.4)                 |
| Much better                           | 76 (20.1)                | 48 (10.9)                |
| A little better                       | 132 (34.9)               | 91 (20.6)                |
| No change                             | 100 (26.5)               | 165 (37.3)               |
| A little worse                        | 45 (11.9)                | 98 (22.2)                |
| Much worse                            | 11 (2.9)                 | 23 (5.2)                 |
| Very much worse                       | 0                        | 2 (0.5)                  |
| Pain Reported                         |                          |                          |
| No                                    | 72 (18.6)                | 59 (13.3)                |
| Yes                                   | 308 (81.1)               | 384 (86.7)               |
| CWP risk profile                      |                          |                          |
| Somatic symptoms score                |                          |                          |
| 0                                     | 224 (59.1)               | 239 (54.1)               |
| 1                                     | 96 (25.3)                | 127 (28.7)               |
| 2-5                                   | 59 (15.6)                | 76 (17.2)                |
| Illness Behaviour Score Mean (SD)[n*] | 8.96 (3.99) [379]        | 9.21 (3.86) [441]        |
| Sleep problems score Mean (SD) [n]    | 8.54 (4.99) [377]        | 9.16 (5.08) [439]        |
| Psychological Distress (GHQ score)    |                          |                          |
| 0                                     | 224 (59.9)               | 207 (47.2)               |
| 1                                     | 50 (13.4)                | 63 (14.4)                |
| 2-5                                   | 65 (17.4)                | 96 (21.9)                |
| 6-12                                  | 35 (9.4)                 | 73 (16.6)                |
|                                       | Mean (SD) [n]            | Mean (SD) [n]            |
| Chalder Fatigue Score                 | 12.2 (4.2) [372]         | 13.6 (4.2) [440]         |
|                                       | Median (IQR) [n]         | Median (IQR) [n]         |
| Quality of Life (EQ-5D utility score) | 0.74 (0.67 - 0.84) [379] | 0.74 (0.65 - 0.84) [442] |
| ICECAP-A                              | 0.89 (0.80 - 0.95) [378] | 0.89 (0.78 - 0.95) [440] |
| Fibromyalgia Research Criteria        |                          |                          |
| WPI                                   | 3 (1 - 4) [370]          | 3 (1 - 4) [432]          |
| SSS                                   | 3 (2 - 5) [373]          | 4 (2 - 5) [433]          |

EQ-5D-5L: Euroqol questionnaire – five dimensions – five levels; FRC: fibromyalgia research criteria; GHQ: general health questionnaire; ICECAP-A: ICEpop CAPability measure for Adults; IQR: interquartile range; SD: standard deviation; SSS: symptom severity scale; tCBT: telephone cognitive behavioural therapy; WPI: widespread pain index. \* The number of persons for whom a scale score could be calculated

**Table S2: Outcomes by treatment arm at 24 months (Intention to treat analysis)**

| Characteristic                        | Randomised groups        |                          |
|---------------------------------------|--------------------------|--------------------------|
|                                       | tCBT (n=500)             | Usual care (n=496)       |
| Primary Outcome                       | N (%)                    |                          |
| Chronic widespread pain               |                          |                          |
| No                                    | 322 (80.4)               | 352 (77.7)               |
| Yes                                   | 78 (19.6)                | 101 (22.3)               |
| Secondary Outcome                     |                          |                          |
| Global impression of change           |                          |                          |
| Very much better                      | 14 (3.7)                 | 15 (3.4)                 |
| Much better                           | 76 (20.1)                | 48 (10.9)                |
| A little better                       | 132 (34.9)               | 91 (20.6)                |
| No change                             | 100 (26.5)               | 165 (33.3)               |
| A little worse                        | 45 (11.9)                | 98 (22.2)                |
| Much worse                            | 11 (2.9)                 | 23 (5.2)                 |
| Very much worse                       | 0                        | 2 (0.5)                  |
| Pain Reported                         |                          |                          |
| No                                    | 95 (23.8)                | 77 (17.0)                |
| Yes                                   | 305 (76.3)               | 376 (83.0)               |
| CWP Risk Profile                      |                          |                          |
| Somatic symptoms score                |                          |                          |
| 0                                     | 184 (59.4)               | 219 (58.1)               |
| 1                                     | 82 (26.5)                | 90 (23.9)                |
| 2-5                                   | 44 (14.2)                | 68 (18.0)                |
| Illness behaviour score Mean (SD)[n*] | 7.75 (4.14) [310]        | 8.95 (4.18) [377]        |
| Sleep problems score Mean (SD) [n]    | 8.45 (5.3) [309]         | 9.06 (5.0) [376]         |
| Psychological Distress (GHQ score)    |                          |                          |
| 0                                     | 168 (54.2)               | 178 (47.3)               |
| 1                                     | 36 (11.6)                | 42 (11.2)                |
| 2-5                                   | 67 (21.6)                | 91 (24.2)                |
| 6-12                                  | 39 (12.6)                | 65 (17.3)                |
|                                       | Mean (SD) [n]            | Mean (SD) [n]            |
| Chalder Fatigue Score                 | 13.0 (4.3) [309]         | 13.9 (4.4) [377]         |
|                                       | Median (IQR) [n]         | Median (IQR) [n]         |
| Quality of Life (EQ-5D utility score) | 0.74 (0.68 – 0.84) [313] | 0.74 (0.65 – 0.84) [386] |
| ICECAP-A                              | 0.91 (0.80 – 0.96) [311] | 0.89 (0.79 – 0.95) [386] |
| Fibromyalgia Research Criteria        | Median (IQR) [n]         | Median (IQR) [n]         |
| WPI                                   | 2 (1 – 4) [306]          | 2.5 (1 – 4) [370]        |
| SSS                                   | 3 (2 – 5) [309]          | 4 (2 – 5) [376]          |

EQ-5D-5L: Euroqol questionnaire – five dimensions – five levels; FRC: fibromyalgia research criteria; GHQ: general health questionnaire; ICECAP-A: ICEpop CAPability measure for Adults; IQR: interquartile range; SD: standard deviation; SSS: symptom severity scale; tCBT: telephone cognitive behavioural therapy; WPI: widespread pain index. \* The number of persons for whom a scale score could be calculated

**Table S3: Unit costs applied to value health care resource use (£, 2017/18 UK prices)**

| Resource                            | Unit  | Source                      | Basis of estimate                                                                                                                                                                                              | Cost (£) |
|-------------------------------------|-------|-----------------------------|----------------------------------------------------------------------------------------------------------------------------------------------------------------------------------------------------------------|----------|
| <i>NHS health care resource use</i> |       |                             |                                                                                                                                                                                                                |          |
| GP                                  | Visit | Curtis 2018                 | 9.22 minutes consultation, including qualification and direct staff                                                                                                                                            | 37       |
| Practice nurse                      | Visit | Curtis 2015, Curtis 2018    | Surgery consultation 15.5 minutes                                                                                                                                                                              | 11       |
| Community physiotherapist           | Visit | Curtis 2018                 | Assumes 30 minutes consultation                                                                                                                                                                                | 17       |
| Other community                     | Visit | Curtis 2018                 | Assumes cost of community physiotherapist                                                                                                                                                                      | 17       |
| CT – Chiropractor                   | Visit | Curtis 2018                 | Assumes cost of community physiotherapist                                                                                                                                                                      | 17       |
| CT – Osteopath                      | Visit | Curtis 2018                 | Assumes cost of community physiotherapist                                                                                                                                                                      | 17       |
| CT – Other                          | Visit | Curtis 2018                 | Assumes cost of community physiotherapist                                                                                                                                                                      | 17       |
| Outpatient – Rheumatology           | Visit | NHS Reference Costs 2017/18 | WF01A Non-Admitted Face to Face Attendance, Follow-up, 410 Rheumatology, WF01B Non-Admitted Face to Face Attendance, Follow-up First, 410 Rheumatology (weighted mean cost over these two categories)          | 150      |
| Outpatient – Orthopaedics           | Visit | NHS Reference Costs 2017/18 | WF01A Non-Admitted Face to Face Attendance, Follow-up, 110 Trauma & Orthopaedics, WF01B, Non-Admitted Face to Face Attendance, First, 110 Trauma & Orthopaedics (weighted mean cost over these two categories) | 125      |
| Outpatient – Other                  | Visit | NHS Reference Costs 2017/18 | WF01A Non-Admitted Face to Face Attendance, Follow-up, 191 Pain Management, WF01B Non-Admitted Face to Face Attendance, First, 191 Pain Management (weighted mean cost over these two categories)              | 149      |
| Other HCP – Physiotherapist         | Visit | NHS Reference Costs 2017/18 | WF01A Non-Admitted Face to Face Attendance, Follow-up, 650 Physiotherapy, WF01B Non-Admitted Face to Face Attendance, First, 650 Physiotherapy (weighted mean cost over these two categories)                  | 55       |
| Other HCP – Other                   | Visit | NHS Reference Costs         | Assumes cost of a physiotherapy attendance                                                                                                                                                                     | 55       |

|                                                 |       | 2017/18                     |                                                                                     |     |
|-------------------------------------------------|-------|-----------------------------|-------------------------------------------------------------------------------------|-----|
| Emergency department                            | Visit | NHS Reference Costs 2017/18 | 180 Accident & Emergency (weighted mean over consultant led and non-consultant led) | 136 |
| Non-elective admission                          | Day   | NHS Reference Costs 2017/18 | HD21 Soft Tissue Disorders (mean cost over CC Score 0-2 and CC Score 3-5)           | 315 |
| Planned (elective) admission                    | Day   | NHS Reference Costs 2017/18 | HD21 Soft Tissue Disorders (mean cost over CC Score 0-2 and CC Score 3-5)           | 377 |
| <i>Private (non-NHS) treatment resource use</i> |       |                             |                                                                                     |     |
| HCP – Doctor                                    | Visit | UK Beam Trial               | Mean cost of private specialist visit - uprated                                     | 183 |
| HCP – Physiotherapist                           | Visit | BUPA                        | Mean cost of private physiotherapist outpatient attendance                          | 47  |
| HCP – Chiropractor                              | Visit | Wonderling et al 2004       | Mean cost of a private visit chiropractor or osteopath – uprated                    | 36  |
| HCP – Osteopath                                 | Visit | Wonderling et al 2004       | Mean cost of a private visit chiropractor or osteopath – uprated                    | 36  |
| HCP – Other (e.g. acupuncturist)                | Visit | BUPA                        | Assumes mean cost of a private physiotherapist outpatient attendance                | 47  |
| HCP – Other                                     | Visit | BUPA                        | Assumes mean cost of a private physiotherapist outpatient attendance                | 47  |
| Hospital admission                              | Day   | UK Beam Trial               | Mean cost of private hospital admission/day – uprated                               | 602 |

GP = General practitioner; HCP = Health care professional; CT=Complementary therapist

**Table S4: Unadjusted mean resource use and costs per patient over 24 months follow-up**

| Resource use item                               | Usual care, n=496 |                        |                     | tCBT, n=500 |                              |                              |
|-------------------------------------------------|-------------------|------------------------|---------------------|-------------|------------------------------|------------------------------|
|                                                 | N                 | Mean resource use (SD) | Mean cost, £ (SD)   | N           | Mean resource use (SD)       | Mean cost, £ (SD)            |
| <i>Intervention</i>                             |                   |                        |                     |             |                              |                              |
| tCBT                                            | 0                 | 0                      | 0                   | 500         | 138.74 (114.08) <sup>1</sup> | 270.19 (209.74) <sup>2</sup> |
| <i>NHS primary care</i>                         |                   |                        |                     |             |                              |                              |
| GP visits                                       | 343               | 8.61 (8.31)            | 318.44 (307.38)     | 277         | 7.51 (8.10)                  | 277.97 (299.86)              |
| Practice nurse visits                           | 343               | 4.11 (5.69)            | 45.19 (62.57)       | 277         | 5.23 (11.87)                 | 57.54 (130.61)               |
| Community physiotherapist visits                | 343               | 2.26 (5.43)            | 38.46 (92.39)       | 277         | 1.90 (3.12)                  | 32.22 (64.83)                |
| Other community health care professional visits | 343               | 0.70 (1.72)            | 11.90 (29.27)       | 277         | 1.20 (3.12)                  | 20.38 (53.99)                |
| Chiropractor visits                             | 343               | 0.66 (3.64)            | 11.30 (61.89)       | 277         | 0.59 (4.51)                  | 10.06 (76.65)                |
| Osteopath visits                                | 343               | 0.57 (3.06)            | 9.62 (51.97)        | 277         | 0.59 (3.27)                  | 10.00 (55.66)                |
| Other complementary therapist visits            | 343               | 2.14 (7.11)            | 36.43 (120.98)      | 277         | 2.31 (6.97)                  | 39.34 (118.53)               |
| Total NHS primary care costs                    | 343               | -                      | 471.34 (447.94)     | 277         | -                            | 447.51 (434.82)              |
| <i>NHS hospital care</i>                        |                   |                        |                     |             |                              |                              |
| Non-elective admission days                     | 343               | 1.24 (6.01)            | 474.61 (2,178.77)   | 277         | 0.81 (4.86)                  | 311.43 (1,752.32)            |
| Elective admission days                         | 343               | 0.98 (2.76)            | 369.61 (1,042.04)   | 277         | 0.78 (2.64)                  | 293.98 (997.85)              |
| Outpatient rheumatology visits                  | 335               | 0.21 (0.95)            | 30.09 (132.36)      | 272         | 0.39 (1.46)                  | 54.04 (203.83)               |
| Outpatient orthopaedics visits                  | 335               | 0.80 (1.80)            | 92.42 (206.56)      | 272         | 0.67 (1.51)                  | 77.37 (173.08)               |
| Other outpatient clinic visits                  | 335               | 2.86 (4.63)            | 408.51 (662.79)     | 273         | 2.27 (3.97)                  | 324.24 (567.88)              |
| Hospital physiotherapist visits                 | 343               | 1.14 (2.71)            | 65.95 (157.40)      | 277         | 1.49 (3.69)                  | 86.69 (214.00)               |
| Other hospital health care professional visits  | 343               | 1.26 (2.83)            | 72.88 (164.27)      | 277         | 1.14 (2.46)                  | 66.17 (142.82)               |
| Total NHS hospital care costs                   | 335               | -                      | 1,503.92 (2,731.09) | 272         | -                            | 1,186.65 (2,425.09)          |
| <i>Private care</i>                             |                   |                        |                     |             |                              |                              |
| Admission days                                  | 343               | 0.12 (0.71)            | 70.02 (426.10)      | 277         | 0.14 (0.79)                  | 82.58 (473.55)               |
| Private doctor visits                           | 343               | 0.39 (1.96)            | 72.03 (357.87)      | 277         | 0.37 (1.12)                  | 67.39 (205.62)               |
