# Supplementary material for: Maintaining musculoskeletal health using a behavioural therapy approach: a population-based randomised controlled trial (the MAmMOTH Study)
Source: HighWire-hosted journal article supplement (doi:10.1136/annrheumdis-2020-219091), 2021-02-01
Supplement: annrheumdis-2020-219091supp003_data_supplement.pdf [file annrheumdis-2020-219091supp003_data_supplement.pdf]

**Figure S1: Cost-effectiveness planes and cost-effectiveness acceptability curves between groups for sensitivity analyses**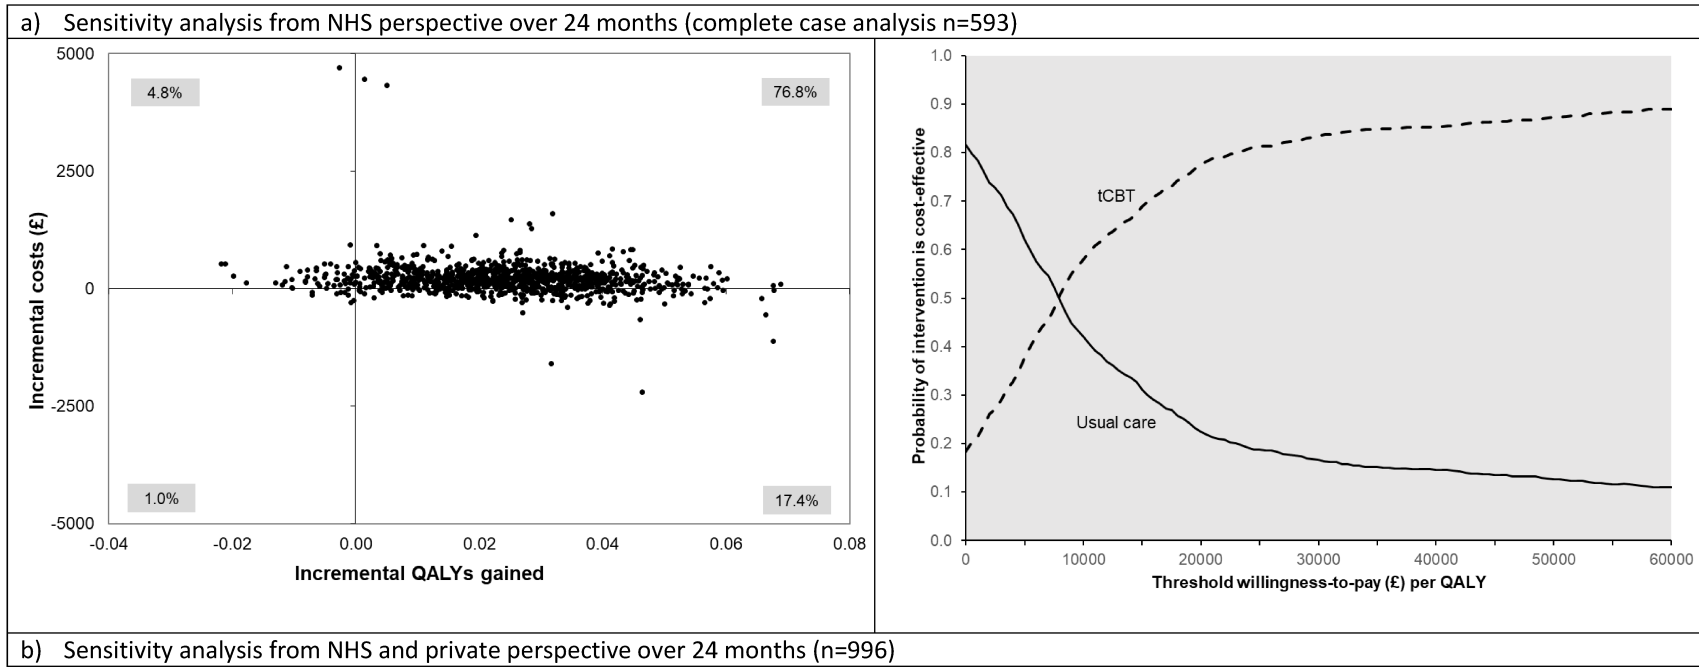

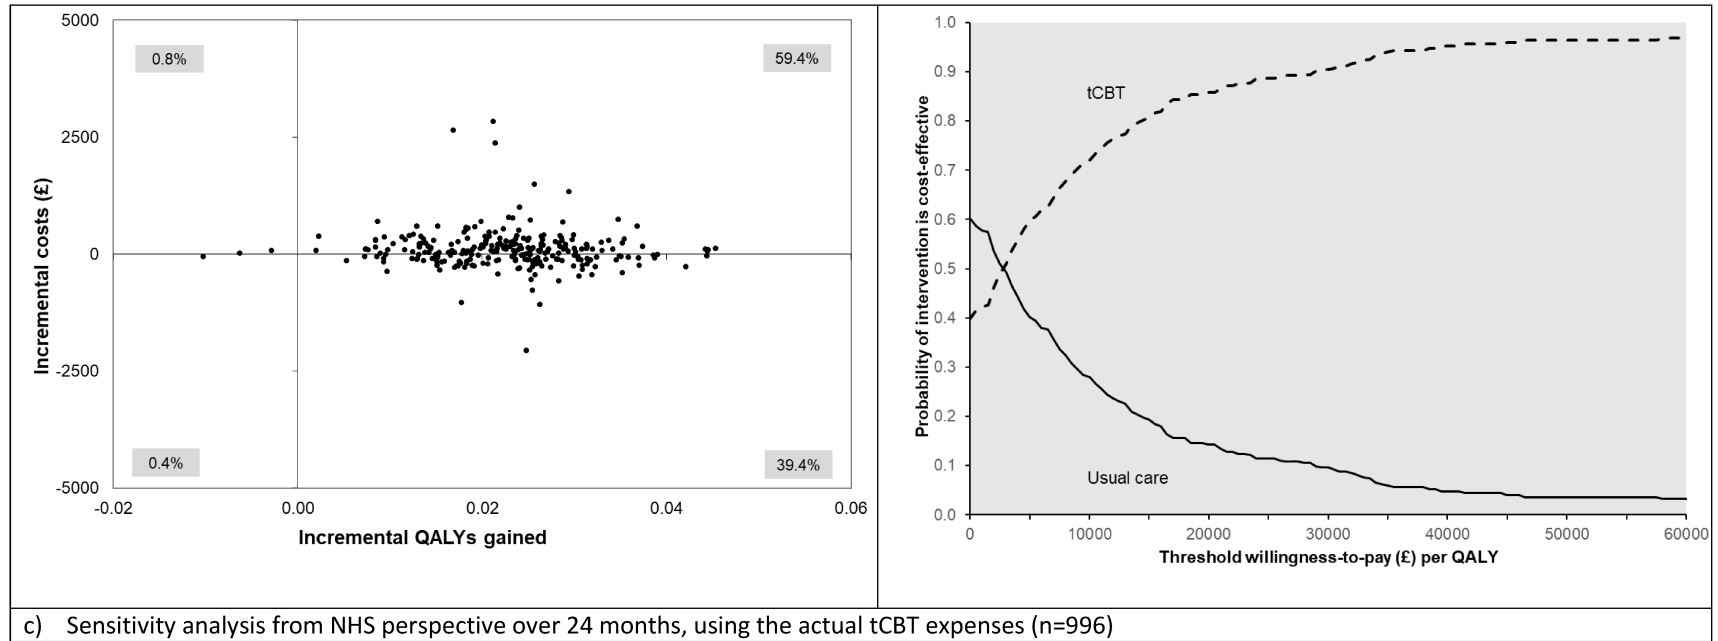

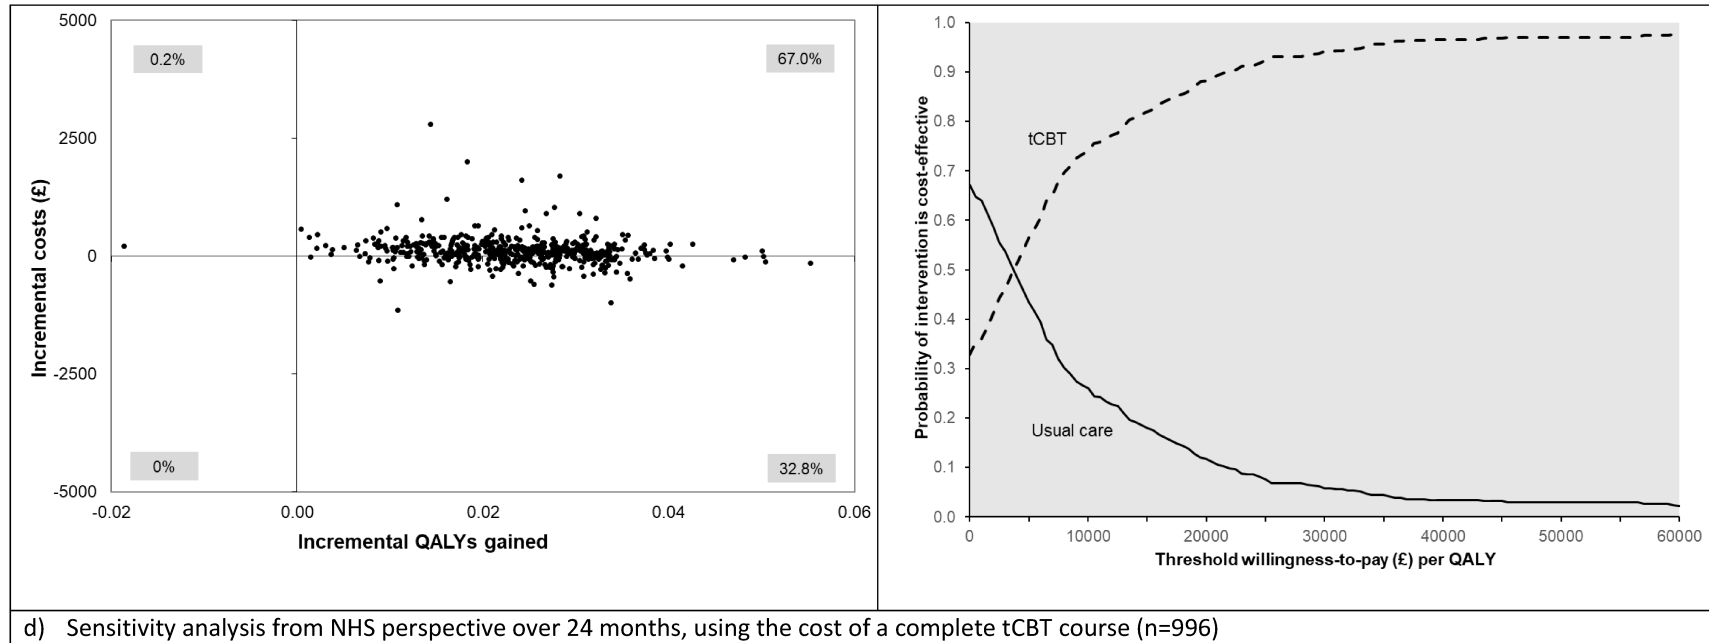

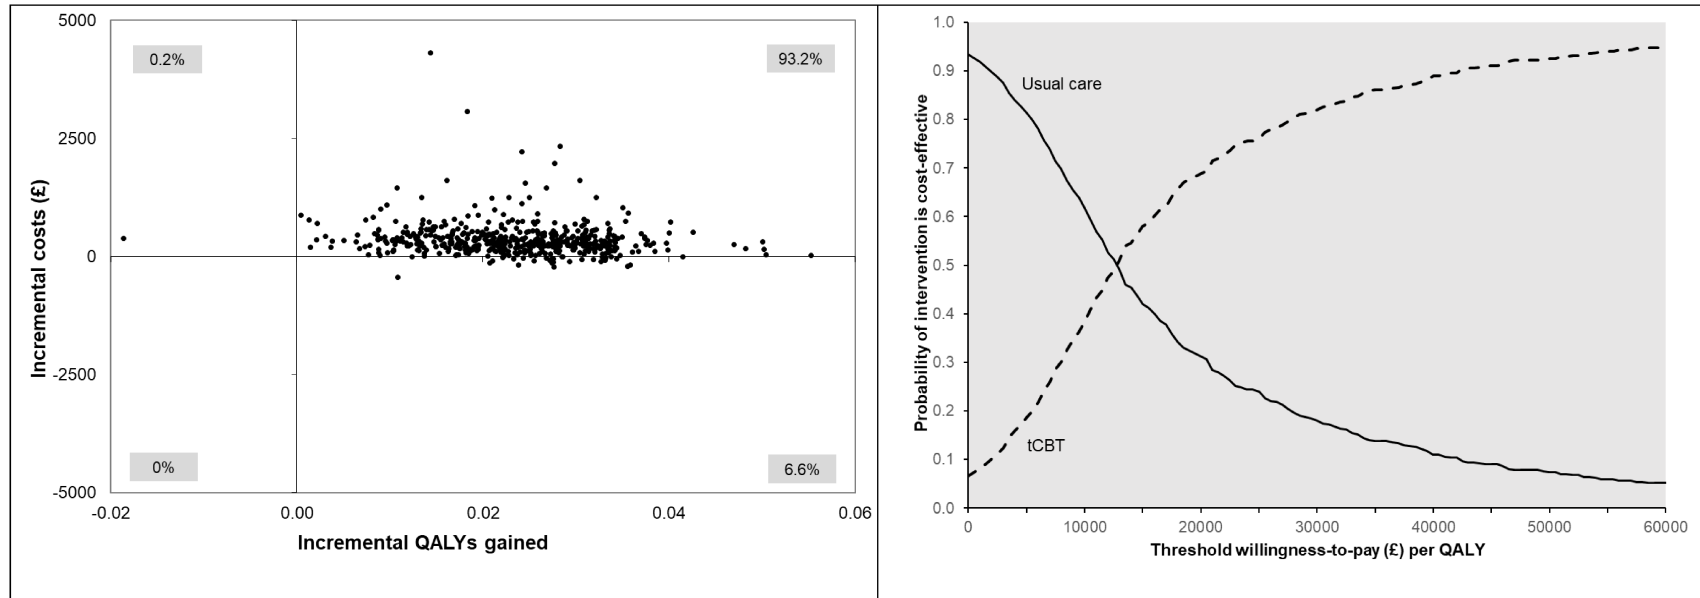

QALY, quality adjusted life year; tCBT, telephone-delivered cognitive behavioural therapy.
